# Supplementary material for: Exploring a high capacity O3-type cathode for sodium-ion batteries and its structural evolution during an electrochemical process
Source: Royal Society of Chemistry journal article supplement (doi:10.1039/c8cc05888a), 2018-01-01
Supplement: c8cc05888a1.pdf [file c8cc05888a1.pdf]

## Electronic supporting information (ESI)

### Exploring a high capacity O3-type cathode for sodium-ion batteries and its structural evolution during electrochemical process

Xueping Zhang,<sup>a</sup> Kezhu Jiang,<sup>a</sup> Shaohua Guo,<sup>\*a</sup> Xiaowei Mu,<sup>a</sup> Xiaoyu Zhang,<sup>a</sup> Ping He,<sup>a</sup> Min Han<sup>a</sup> and Haoshen Zhou<sup>\*ab</sup>

<sup>a</sup> College of Engineering and Applied Sciences, National Laboratory of Solid State Microstructures, Collaborative Innovation Center of Advanced Microstructures, Nanjing University, Nanjing 210093, China.

<sup>b</sup> Energy Technology Research Institute, National Institute of Advanced Industrial Science and Technology (AIST), Tsukuba 305-8568, Japan.

Correspondence and request for materials should be addressed to S.G. (shguo@nju.edu.cn) or H.Z. (hszhou@nju.edu.cn).

## Experiments

### Material synthesis

NaFe<sub>0.25</sub>Mn<sub>0.25</sub>Ni<sub>0.25</sub>Ti<sub>0.25</sub>O<sub>2</sub> (NFMNT) was prepared by a traditional solid state reaction. Stoichiometric amounts of Fe<sub>2</sub>O<sub>3</sub>, Mn<sub>2</sub>O<sub>3</sub>, NiO, TiO<sub>2</sub> with 5% excess Na<sub>2</sub>CO<sub>3</sub>, were mixed by ball milling at 300 rpm for 5 h and the resulting mixture were pressed pellets, and then pellets were heated 900 °C for 15 h under flowing O<sub>2</sub> at a heating rate of 5 °C/min. After quenching down to room temperature, the sample was stored into an Ar filled glove box.

### Material characterization

All the XRD patterns were collected on a D8 Advance diffractometer (Bruker) with Cu K $\alpha$  radiation ( $\lambda = 1.5418 \text{ \AA}$ ). Rietveld refinement of the XRD data were performed with general structural analysis system (GSAS).<sup>1</sup> The morphology of powder was observed by scanning electron microscopy (SEM, Hitachi SU8010) and high-resolution transmission electron microscopy (HRTEM, FEI TECNAI F20). The distribution of each element was tested by the energy dispersive spectroscopy (EDS) mapping. The accurate elementary composition of the sample was measured by inductively coupled plasma-absorption emission spectrometry (ICP-AES). X-ray photoelectron spectroscopy (XPS) were conducted on a Thermo Scientific ESCALAB 250 XI X-ray photoelectron spectrometer.

### Electrochemical measurements

The cathode consists of NFMNT: acetylene black: polyvinylidene fluoride (PVDF) with the ratio of 60: 35: 5 onto a clean Al foil coating carbon. And then the electrode was placed in a vacuum oven at 120 °C for 5h. Sodium half-cells were assembled in an Ar-filled glove box with a solution of 1 M NaPF<sub>6</sub> in propylene carbonate (PC, with 2% fluoroethylene carbonate (FEC) as an additive) as electrolyte. The electrochemical properties were carried out on a Land BT2000 battery tester in Na half-cells at the galvanostatic mode. The operando XRD data was collected by a “relaxed” in situ test. The cell was tested at 0.4 C for 5 min, then a relaxation process was equal to 1 h.

**Tab. S1. Cell parameters and other results of NFMNT sample**

| Sample            | NFMNT                    |             |
|-------------------|--------------------------|-------------|
| Phase             | O3-type                  |             |
| Space Group       | $R\bar{3}m$              |             |
| Cell Parameters   | a (Å)                    | 2.97390(5)  |
|                   | b (Å)                    | 2.97390(5)  |
|                   | c (Å)                    | 16.22774(3) |
|                   | $\alpha$ (°)             | 90.000      |
|                   | $\beta$ (°)              | 90.000      |
|                   | $\gamma$ (°)             | 120.000     |
|                   | Volume (Å <sup>3</sup> ) | 124.29(2)   |
| Agreement Factors | R <sub>wp</sub> (%)      | 5.42        |
|                   | R <sub>p</sub> (%)       | 3.16        |
|                   | CHI                      | 7.062       |

**Tab. S2. Atomic positions from XRD for each element of NFMNT sample**

| Position | x | y | z      | <i>U</i> <sub>iso</sub> | <i>Occ.</i> |
|----------|---|---|--------|-------------------------|-------------|
| Na       | 0 | 0 | 0.5    | 0.0470(9)               | 0.937(5)    |
| Fe       | 0 | 0 | 0      | 0.0298(3)               | 0.267(1)    |
| Mn       | 0 | 0 | 0      | 0.0310(4)               | 0.240(3)    |
| Ni       | 0 | 0 | 0      | 0.0311(5)               | 0.250(3)    |
| Ti       | 0 | 0 | 0      | 0.0625(6)               | 0.237(0)    |
| O        | 0 | 0 | 0.2694 | 0.0362(0)               | 0.972(2)    |

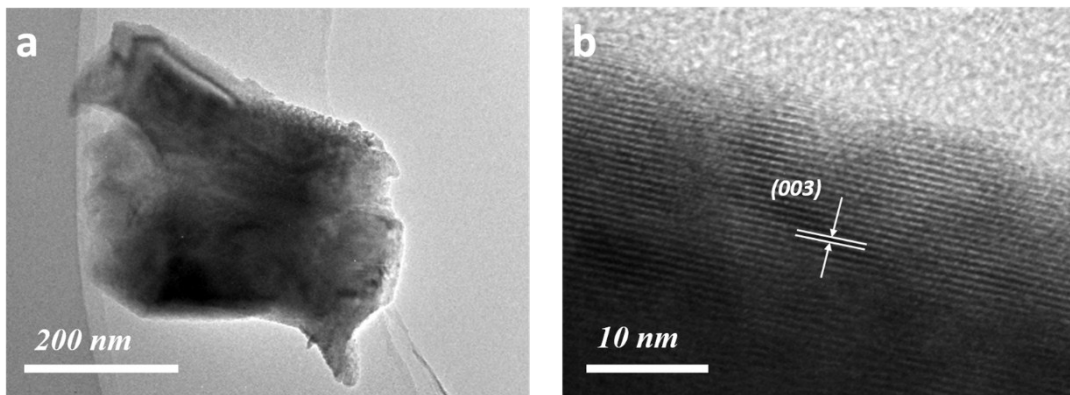**Fig. S1. (a) TEM and (b) HRTEM image of NFMNT.**

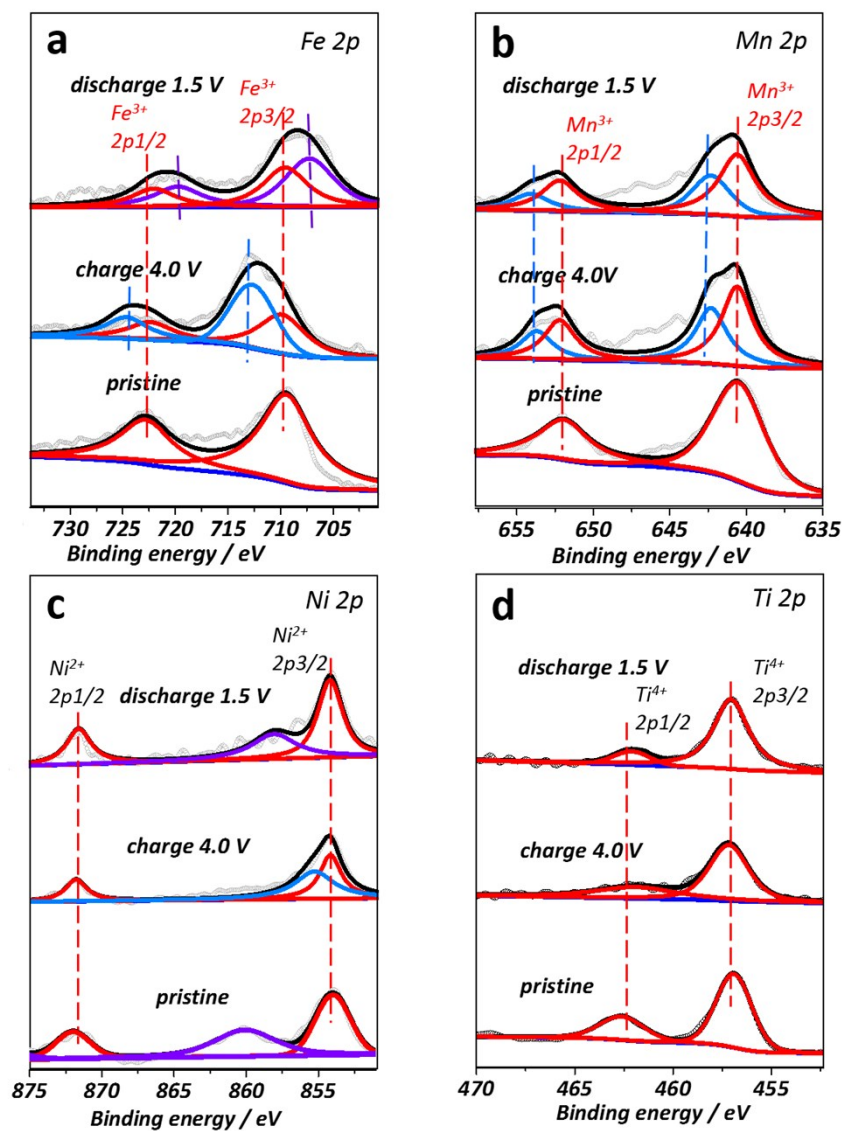

**Fig S2.** XPS patterns of (a) Fe 2p, (b) Mn 2p, (c) Ni 2p and (d) Ti 2p for the pristine, charged and discharged electrodes, respectively. The satellite peak of ~460 eV in Ni 2p spectra also was presented.

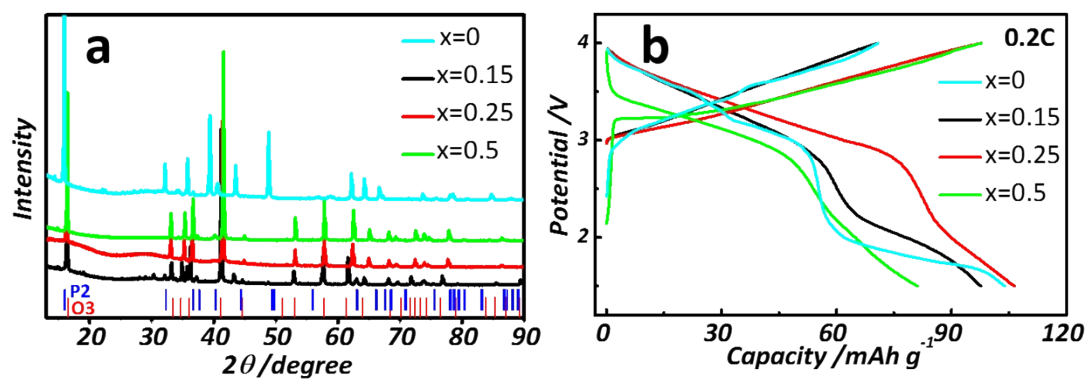

Fig S3. (a)The XRD data and (b) charge-discharge curves of  $\text{NaFe}_x\text{Mn}_{0.5-x}$

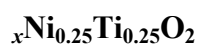

## References

1. Larson, A. C. and Von Dreele, R. B. GSAS: General Structure Analysis System (LANSCCE, MS-H805, Los Alamos, NM, 1994).
